# Supplementary material for: Molecular descriptor data explain market prices of a large commercial chemical compound library
Source: PubMed Central journal article supplement (PMC4917835; doi:10.1038/srep28521), 2016-06-23
Supplement: srep28521-s1.pdf [file srep28521-s1.pdf]

## **Molecular descriptor data explain market prices of a large commercial chemical compound library**

Jaroslav Polanski,<sup>\*[a]</sup> Urszula Kucia,<sup>[a]</sup> Roksana Duszkiewicz,<sup>[a]</sup> Agata Kurczyk,<sup>[b]</sup> Tomasz Magdziarz,<sup>[b]</sup> Johann Gasteiger<sup>[c]</sup>

<sup>1.</sup> *Institute of Chemistry, University of Silesia, 9 Szkolna Street, 40-006 Katowice, Poland*

<sup>2.</sup> *Institute of Automatic Control, Silesian University of Technology, 16 Akademicka Street, 44-100 Gliwice, Poland*

<sup>3.</sup> *Silesian University of Technology, 16 Akademicka Street, 44-100 Gliwice, Poland*

<sup>4.</sup> *Computer-Chemie-Centrum, University of Erlangen-Nuernberg, Naegelsbachstrasse 25, 91052 Erlangen, Germany.*

## Table of Contents

|                                                                                        |   |
|----------------------------------------------------------------------------------------|---|
| Data .....                                                                             | 3 |
| Variability of the investigated building block library by the correlation matrix ..... | 4 |
| Statistical analyses.....                                                              | 5 |
| Molecular descriptors and data preprocessing.....                                      | 5 |
| Principal component analysis (PCA) .....                                               | 6 |
| Additional figures.....                                                                | 8 |
| .....                                                                                  |   |

## **Data**

Since data exceed the allowed upload volume the excel files (ca. 50 MB) with all data and calculated SYLVIA scores together with the scripts are available on request from authors.

## Variability of the investigated building block library by the correlation matrix

Full version of Table 1.

**Table S1** Correlation coefficients for simple molecular descriptors, MW, atom counts, and calculated synthetic availability indicators, in assessing WBM and MBM prices of the building block library of 2,248,243 compounds

|      | P1    | P2    | MW    | AC    | C     | H     | N     | SAS1  | SAS2  | SAS3  | SAS4  | SAS5  |
|------|-------|-------|-------|-------|-------|-------|-------|-------|-------|-------|-------|-------|
| P1   | 1     | .857  | -.033 | .171  | -.105 | .177  | .216  | .341  | .006  | -.001 | .200  | .157  |
| P2   | .857  | 1     | .474  | .045  | -.108 | .005  | .096  | .239  | .168  | -.004 | .118  | .113  |
| MW   | -.033 | .474  | 1     | -.213 | -.034 | -.302 | -.187 | -.116 | .323  | -.007 | -.113 | -.053 |
| AC   | .171  | .045  | -.213 | 1     | .598  | .983  | -.102 | .380  | -.245 | -.160 | .403  | -.103 |
| C    | -.105 | -.108 | -.034 | .598  | 1     | .542  | -.446 | .081  | -.212 | .115  | .215  | -.117 |
| H    | .177  | .005  | -.302 | .983  | .542  | 1     | -.093 | .378  | -.349 | -.169 | .421  | -.100 |
| N    | .216  | .096  | -.187 | -.102 | -.446 | -.098 | 1     | .031  | .049  | .019  | -.175 | .345  |
| SAS1 | .341  | .239  | -.116 | .380  | .081  | .378  | .031  | 1     | .173  | .182  | .831  | .206  |
| SAS2 | .006  | .168  | .323  | -.245 | -.212 | -.349 | .049  | .173  | 1     | .097  | -.079 | .114  |
| SAS3 | -.001 | -.004 | -.007 | -.160 | .115  | -.169 | .019  | .182  | .097  | 1     | .015  | .199  |
| SAS4 | .200  | .118  | -.123 | .403  | .215  | .421  | -.175 | .831  | -.079 | .015  | 1     | -.026 |
| SAS5 | .157  | .113  | -.053 | -.103 | -.117 | -.100 | .345  | .206  | .114  | .199  | -.026 | 1     |

The synthetic accessibility scores (SAS1-SAS5) were calculated using SYLVIA software; all correlation coefficients were calculated by MATLAB *corrcoef* function including formally discrete atom counts variables.

P1 - Price (WBM);

P2 - Molar price (MBM);

MW -molecular weight;

AC - Atom count;

C - C atom count;

H - H atom count;

N - N atom count;

SAS1 - synthetic accessibility score (M\_SYN\_ACCESSIBILITY);

SAS2 - molecular graph complexity score (M\_GRAPH\_SCORE);

SAS3 - ring complexity score (M\_RING\_SCORE);

SAS4 - stereochemical complexity score (M\_STEREO\_SCORE);

SAS5 - reaction center substructure score (M\_REACTION\_CENTER\_SCORE).

## Statistical analyses

A principal component analysis (PCA) if used to analyze the data variability indicates that the first two components explain only 30% of variance.

### ***Molecular descriptors and data preprocessing***

Following is a list of molecular descriptors used in PCA analysis:

- Mol\_weight
- Price\_1g
- LogP
- Atom\_count
- Bond\_count
- Chiral\_atom
- H\_bond\_acceptors
- H\_bond\_donors
- Ring\_count
- Rotable\_bonds
- C
- H
- N
- O
- S
- Br
- F
- I
- Se
- Na
- Sn
- P
- Si
- B
- K
- Cl

Additionally following descriptors calculated by RDKit 201403 were used:

- BalabanJ
- BertzCT
- FractionCSP3
- HallKierAlpha
- HeavyAtomCount
- HeavyAtomMolWt
- lpc
- Kappa1
- Kappa2
- Kappa3
- LabuteASA
- MaxAbsEStateIndex
- MaxEStateIndex
- MinAbsEStateIndex
- MinEStateIndex
- MolMR
- NHOHCount

- NOCount
- NumAliphaticCarbocycles
- NumAliphaticHeterocycles
- NumAliphaticRings
- NumAromaticCarbocycles
- NumAromaticHeterocycles
- NumAromaticRings
- NumHeteroatoms
- NumRotatableBonds
- NumSaturatedCarbocycles
- NumSaturatedHeterocycles
- NumSaturatedRings
- NumValenceElectrons
- TPSA

Additionally 5 descriptors calculated by SYLVIA were used

- M\_SYN\_ACCESSIBILITY
- M\_GRAPH\_SCORE
- M\_RING\_SCORE
- M\_STEREO\_SCORE
- M\_REACTION\_CENTER\_SCORE

In total 62 molecular descriptors were used. Molecular descriptors calculations failed for 182 compounds (RDKit failed for 2, SYLVIA failed for 180) and these compounds were removed from the set. Resulting matrix was of shape 2248061 x 62.

Prior to PCA data was submitted to so called Standardization preprocessing, ie columns were centralized (mean values equal to 0) and divided by standard deviation values (variance set to 1 for all columns).

### ***Principal component analysis (PCA)***

A principal component analysis (PCA) if used to analyze the data variability indicates that the first two components explain only 30% of variance and 53 components explain 100% (see also Figure S2). Figure S1 shows score plot of PC1 and PC2. Top ten contributing variables for first two components is following:

- TPSA
- H
- Atom\_count
- NumHeteroatoms
- FractionCSP3
- Bond\_count
- NOCount
- NumAromaticRings
- BertzCT
- C



## Additional figures

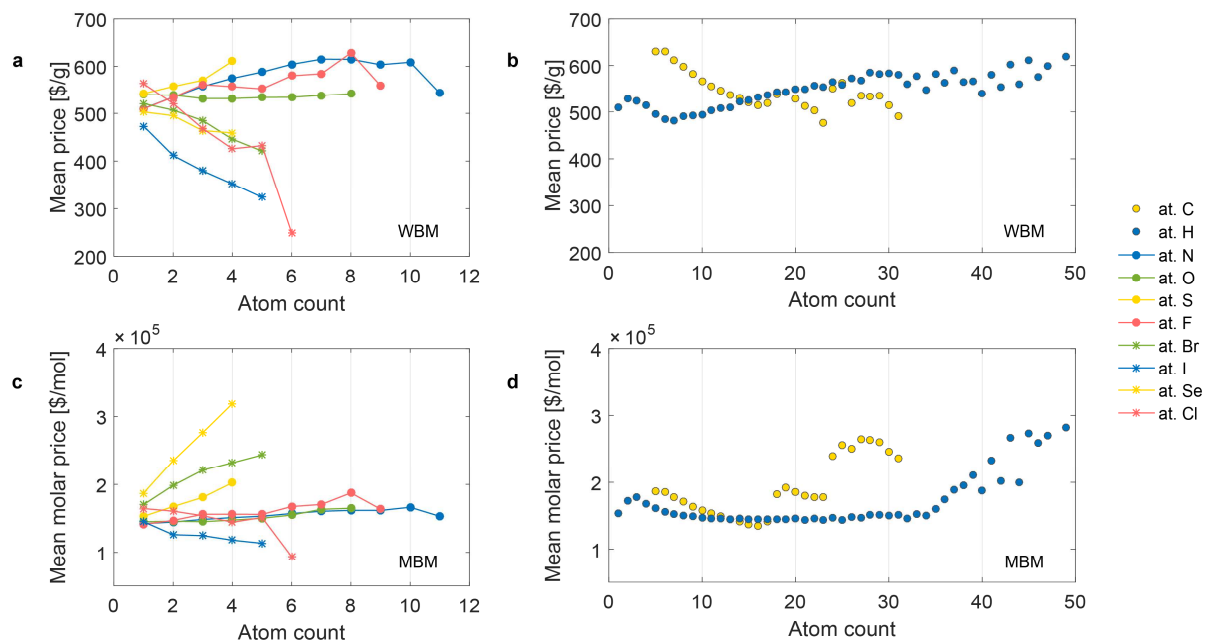

**Figure S3. Atom count statistics of economic data. a-b,** Mean prices (WBM) **and c-d,** Mean molar prices (MBM) plotted vs. (hetero)atom count.



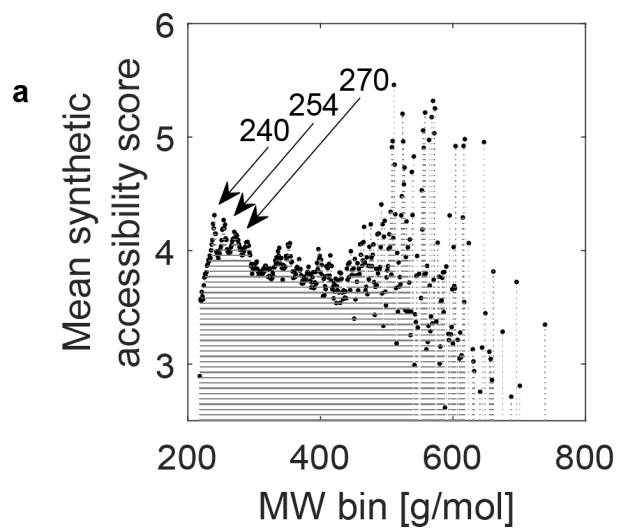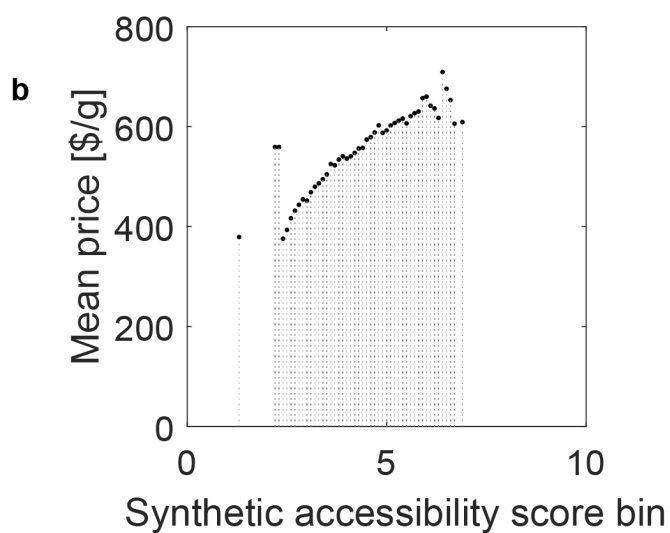

**Figure S4. a, Binned MW statistics of mean synthetic accessibility (SYLVIA) compared with b, Mean prices (WBM) plotted as a function of synthetic accessibility bins.**

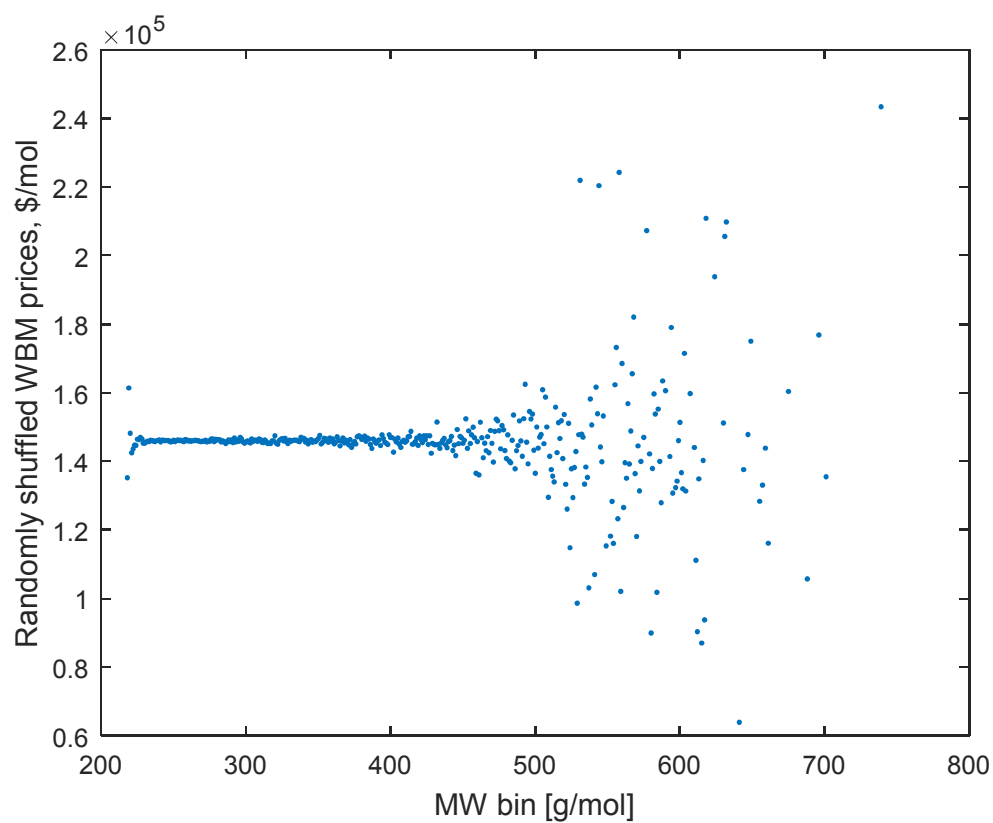

a

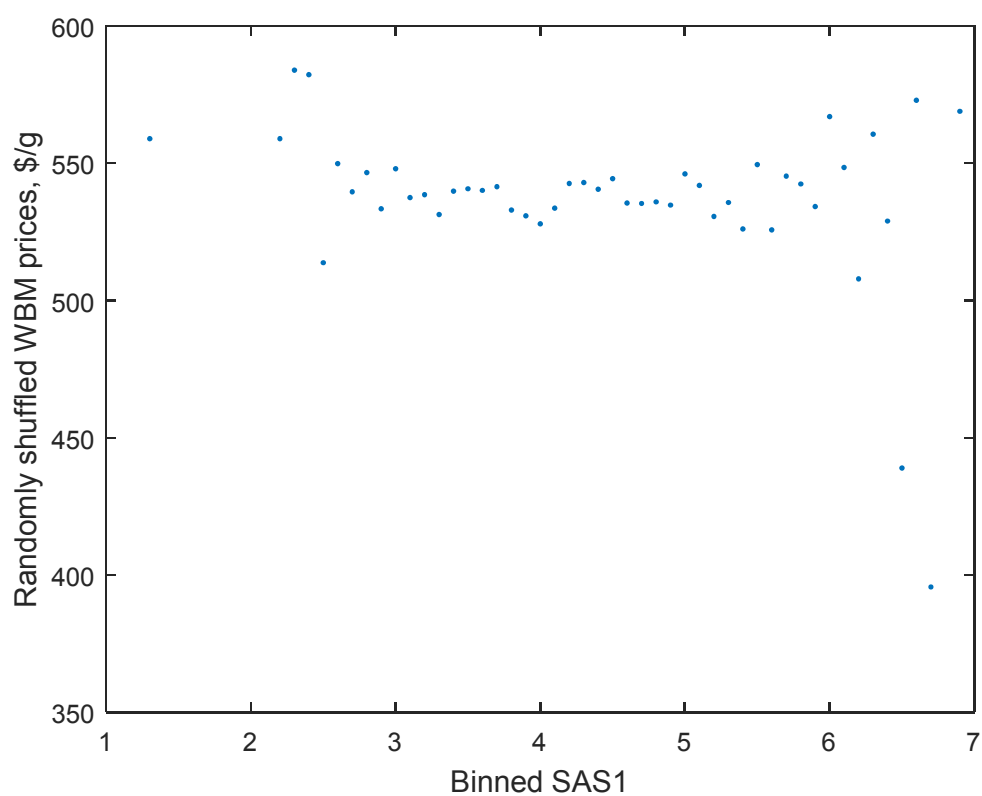

b

**Figure S5. Statistical credibility tests.** **a**, randomly shuffled mean WBM prices plotted vs. MW bins and random numbers (0-1); **b**, randomly shuffled mean WBM prices plotted vs. binned SAS1; mean value of MBM price amounts to  $1.45 \times 10^5$  \$/mol.
